# Supplementary material for: Development of a high-throughput and sensitive assay of fusion genes in lung cancer by array-based MALDI-TOFMS
Source: Royal Society of Chemistry journal article supplement (doi:10.1039/c8ra05165h), 2018-01-01
Supplement: c8ra05165h1.pdf [file c8ra05165h1.pdf]

**Table S1.** Thermocycling cocktail of Sanger Sequencing PCR

| Reagents                 | Volume ( $\mu\text{L}$ ) |
|--------------------------|--------------------------|
| PCR buffer               | 5                        |
| Tag enzyme               | 0.25                     |
| dNTP                     | 4                        |
| amplification primer mix | 2                        |
| H <sub>2</sub> O         | 37.75                    |
| cDNA                     | 1(10ng/ $\mu\text{L}$ )  |

**Table S2.** Thermocycling cocktail of array-based MALDI-TOF PCR

| Reagents          | Volume( $\mu\text{L}$ ) |
|-------------------|-------------------------|
| H <sub>2</sub> O  | 0.44                    |
| PCR buffer        | 0.5                     |
| MgCl <sub>2</sub> | 0.4                     |
| dNTP              | 0.1                     |
| PCR primer mix    | 1.0                     |
| Quality control   | 0.36                    |

---

|            |                    |
|------------|--------------------|
| PCR enzyme | 0.2                |
| cDNA       | 2 (10 ng/ $\mu$ L) |

---

**Table S3.** Thermocycling cocktail of array-based MALDI-TOF SAP

---

| Reagents                    | Volume( $\mu$ L) |
|-----------------------------|------------------|
| H <sub>2</sub> O            | 1.53             |
| SAP buffer                  | 0.17             |
| Shrimp alkaline phosphatase | 0.30             |

---

**Table S4.** Thermocycling cocktail of array-based MALDI-TOF extension reaction

| Reagents             | Volume( $\mu$ L) |
|----------------------|------------------|
| H <sub>2</sub> O     | 0.62             |
| Buffer plus          | 0.20             |
| Termination mix      | 0.20             |
| Extension primer mix | 0.94             |
| Extension enzyme     | 0.04             |

**Table S5.** Thermocycling conditions of Sanger sequencing and array-based MALDI-TOF

| Item                                              | Cycles   | Temperature | Time  |
|---------------------------------------------------|----------|-------------|-------|
| Thermocycling conditions of Sanger Sequencing PCR | 40cycles | 95°C        | 10min |
|                                                   |          | 95°C        | 30s   |
|                                                   |          | 58°C        | 30s   |
|                                                   |          | 72°C        | 60s   |
| Thermocycling conditions of PCR                   | 45cycles | 72°C        | 7min  |
| 95°C                                              |          | 2min        |       |
| 95°C                                              |          | 30s         |       |
| 56°C                                              |          | 30s         |       |
| Thermocycling conditions of SAP                   | No cycle | 72°C        | 1min  |
|                                                   |          | 72°C        | 5min  |
|                                                   |          | 4°C         | 4min  |
|                                                   |          | 37°C        | 40min |
| Thermocycling conditions of extension reaction    | 40cycles | 85°C        | 5min  |
|                                                   |          | 4°C         | 5min  |
|                                                   |          | 95°C        | 30s   |
|                                                   |          | 95°C        | 5s    |
|                                                   |          | 52°C        | 5s    |
|                                                   |          | 80°C        | 5s    |
|                                                   |          | 72°C        | 3min  |
|                                                   |          | 4°C         | 5min  |
